# Supplementary material for: BaTa0.5Li0.5O2.5: a new highly oxygen deficient perovskite oxide-ion conductor
Source: Royal Society of Chemistry journal article supplement (doi:10.1039/d3ya00268c), 2023-11-20
Supplement: d3ya00268c1.pdf [file d3ya00268c1.pdf]

## Supplementary Information for

### **BaTa<sub>0.5</sub>Li<sub>0.5</sub>O<sub>2.5</sub>: A New Highly Oxygen Deficient Perovskite Oxide-Ion**

#### **Conductor**

Jungu Xu<sup>1,\*</sup>, Qin Cao<sup>1</sup>, Lin Wang<sup>2</sup>, Bin Ouyang<sup>2,\*</sup>, Tianjie Wei<sup>1</sup>, Jiazheng Hao<sup>3,4</sup>, Jie

Chen<sup>3,4</sup>, Lunhua He<sup>3,5,6,\*</sup>, Laijun Liu<sup>1</sup>, Kevin Huang<sup>7,\*</sup>

\*Corresponding author: [xujungu@glut.edu.cn](mailto:xujungu@glut.edu.cn); [bouyang@fsu.edu](mailto:bouyang@fsu.edu); [lhhe@ihep.ac.cn](mailto:lhhe@ihep.ac.cn);  
[huang46@cec.sc.edu](mailto:huang46@cec.sc.edu)

1. *MOE Key Laboratory of New Processing Technology for Nonferrous Metals and Materials, Guangxi Universities Key Laboratory of Non-ferrous Metal Oxide Electronic Functional Materials and Devices, College of Materials Science and Engineering, Guilin University of Technology, Guilin 541004, China.*
2. *Department of Chemistry and Biochemistry, Florida State University, Tallahassee, FL 32304, United States*
3. *Spallation Neutron Source Science Center, Dongguan 523803, China*
4. *Institute of High Energy Physics, Chinese Academy of Sciences, Beijing 100049, China*
5. *Beijing National Laboratory for Condensed Matter Physics, Institute of Physics, Chinese Academic of Sciences, Beijing 100190, China.*
6. *Songshan Lake Materials Laboratory, Dongguan 523808, China*
7. *Department of Mechanical Engineering, University of South Carolina, Columbia, South Carolina, 29201, United States*

(1) MSD data from AIMD simulations

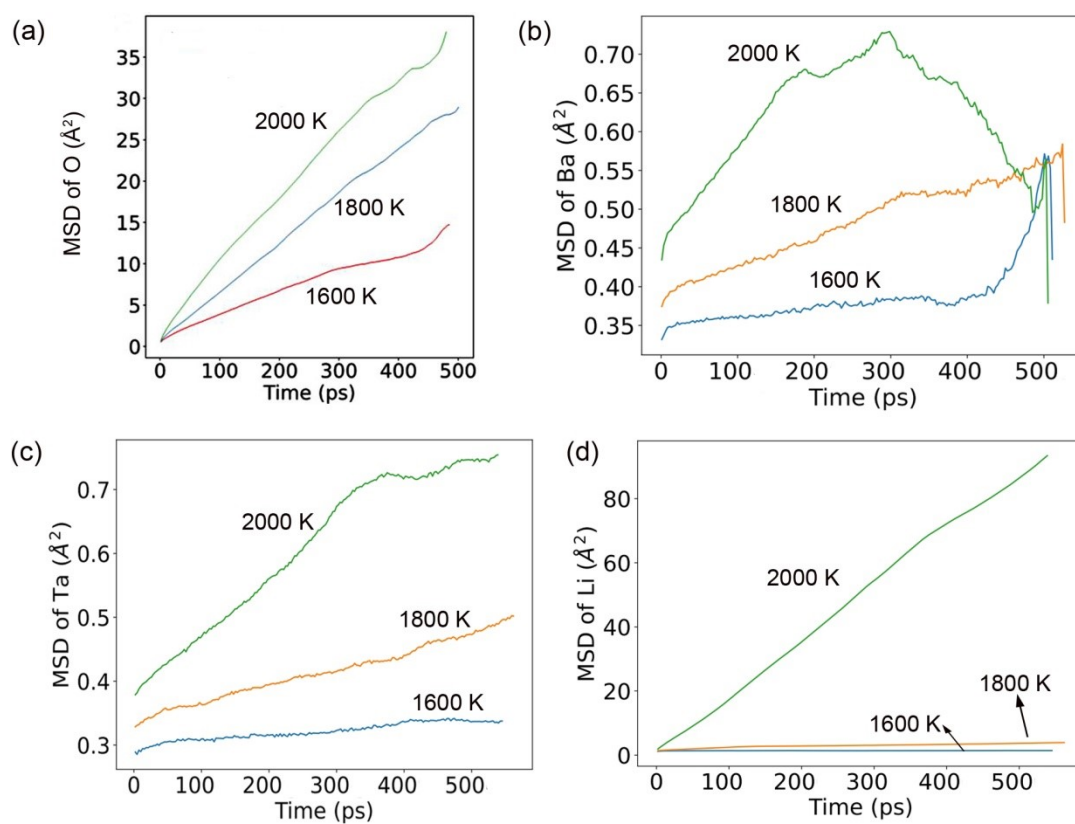

**Figure S1.** Mean square displacement (MSD) plot of (a)  $\text{O}^{2-}$ , (b)  $\text{Ba}^{2+}$ , (c)  $\text{Ta}^{5+}$ , and (d)  $\text{Li}^+$  ions during AIMD simulations of three selected temperatures.
